# Supplementary material
Source: PubMed Central journal article supplement (PMC5659909)
Supplement: NIHMS901671-supplement.pdf [file NIHMS901671-supplement.pdf]

## Supplementary Methods

**Data authorization and access.** To access TCGA germline sequence data, we obtained approval from the Database of Genotypes and Phenotypes (dbGaP) data access committee and the study conforms to the data usage agreement. Clinical characteristics for individuals with rare germline variants were downloaded from the TCGA website (<https://tcga-data.nci.nih.gov/tcga/>, November 24, 2014). Somatic mutation burden data were obtained from CBioPortal for Cancer Genomics ([www.cbioportal.org](http://www.cbioportal.org), January 20, 2017)<sup>22, 23</sup>.

**Sequence analysis.** At the time of initial access, a total of 842 normal/non-tumor tissue genome and/or exome data were available; they represented 555 unique TCGA identifiers. We downloaded raw BAM alignment files for the eight genes (hg19 coordinates) for samples coded as “blood” or “normal/non-tumor” from the Cancer Genomics Hub (<https://cghub.ucsc.edu/>) (October 15, 2014). The raw BAM files were processed using GATK realigner (<https://www.broadinstitute.org/gatk/index.php>) to optimize detection of insertions/deletions (indels). PCR and optical duplicates were identified and filtered with Picard (<http://broadinstitute.github.io/picard/>). Genomic variant calls were made by converting BAM files into genomic positions with mpileup and using bcftools to make genotype calls. For annotation of mutation positions, we used the following accession numbers: ATM (NM\_000051), BRCA2 (NM\_000059), CHEK2 (NM\_001005735), EGFR (NM\_005228), PARK2 (NM\_004562), TERT (NM\_198253), TP53 (NM\_000546) and YAP1 (NM\_001282101.1). We annotated and filtered the variant call files (vcf) using PhenoDB<sup>24</sup>.

**Filtering of variants.** We used a filtering algorithm similar to that previously utilized<sup>25</sup>. We first selected variants with minor allele frequency <0.005 in dbSNP build 129, 1000 genomes project, and the Exome Variant Server. Non-synonymous, splice altering and indel variants with at least 20x read depth were then filtered in a second step by frequency in the Exome Aggregation Server (ExAC) (September 30, 2015). Those with a minor allele frequency of  $\leq 5 \times 10^{-5}$  were manually verified in raw data files that were downloaded from a second, independently sequenced tumor and/or duplicate normal sample to confirm the germline nature and visualized manually in the Integrated Genomics Viewer (IGV)<sup>26</sup>. Variants not confirmed in a second sample were not analyzed further. Variants that confirmed had to be in 30% to 70% of reads to be considered heterozygous. Each variant call in Table 1 was verified manually and independently by at least two of the authors.

**Variant analysis.** To determine the significance of the extremely rare variants we identified, we performed a literature search. *ATM* variants were examined in the Ataxia-Telangiectasia syndrome database (<http://chromium.lovd.nl/LOVD2>). *EGFR* mutations were considered further if they fell in exons 18-21, as per the standards defined in the literature<sup>27</sup>. To determine the significance of *TP53* mutations, we accessed the Li Fraumeni database at <http://p53.iarc.fr/RefsLiFraumeni.aspx><sup>28</sup>. For the remaining tumor suppressor genes, *BRCA2*, *CHEK2* and *PARK2*, rare frameshift variants predicting a null allele were considered deleterious. To characterize the remaining variants, we queried the ClinVar database (<https://www.ncbi.nlm.nih.gov/clinvar/>) (accessed June, 2015) and other rare variants were classified as variants of unknown significance (VUS) and analyzed using PolyPhen-2

(<http://genetics.bwh.harvard.edu/pph2/bgi.shtml>), Provean ([http://provean.jcvi.org/protein\\_batch\\_submit.php?specieshuman](http://provean.jcvi.org/protein_batch_submit.php?specieshuman)) and SIFT (<http://sift.bii.a-star.edu.sg/>) (October 15, 2015).

**Statistics.** We used GraphPad Prism v.6.05 software (GraphPad, La Jolla, CA) to generate the pie chart, and to calculate the odds ratio and confidence intervals. The chi-square calculation was two-sided using a Yates' correction.

### Supplementary References

22. Cerami E, Gao J, Dogrusoz U, et al. The cBio cancer genomics portal: an open platform for exploring multidimensional cancer genomics data. *Cancer Discov* 2012;2:401-404.
23. Gao J, Aksoy BA, Dogrusoz U, et al. Integrative analysis of complex cancer genomics and clinical profiles using the cBioPortal. *Sci Signal* 2013;6:pl1.
24. Hamosh A, Sobreira N, Hoover-Fong J, et al. PhenoDB: a new web-based tool for the collection, storage, and analysis of phenotypic features. *Hum Mutat* 2013;34:566-571.
25. Stanley SE, Chen JJ, Podlevsky JD, et al. Telomerase mutations in smokers with severe emphysema. *J Clin Invest* 2015;125:563-570.
26. Robinson JT, Thorvaldsdottir H, Winckler W, et al. Integrative genomics viewer. *Nature biotechnology* 2011;29:24-26.
27. Paez JG, Janne PA, Lee JC, et al. EGFR mutations in lung cancer: correlation with clinical response to gefitinib therapy. *Science* 2004;304:1497-1500.
28. Petitjean A, Mathe E, Kato S, et al. Impact of mutant p53 functional properties on TP53 mutation patterns and tumor phenotype: lessons from recent developments in the IARC TP53 database. *Human mutation* 2007;28:622-629.

**Supplementary Table 1. Ultra-rare variants of unknown significance identified in TCGA adenocarcinoma cases for *ATM*, *BRCA2*, *CHEK2*, *EGFR*, *PARK2*, *TP53* (n=52)**

| Germline Mutation* | Age | M/F | Validation source of DNA | Smoking status | Pack-years | Prior Malignancy | Evidence of pathogenicity               |             |                         |
|--------------------|-----|-----|--------------------------|----------------|------------|------------------|-----------------------------------------|-------------|-------------------------|
|                    |     |     |                          |                |            |                  | POLYPHEN                                | PROVEAN     | SIFT                    |
| <b><u>ATM</u></b>  |     |     |                          |                |            |                  |                                         |             |                         |
| <i>ATM</i> R720H   | 58  | F   | Tumor                    | Former         | 40         |                  | Possibly damaging/Benign                | Neutral     | Tolerated               |
| <i>ATM</i> R720S   | 61  | M   | Tumor                    | Current        | na         |                  | Benign/Benign                           | Neutral     | Tolerated               |
| <i>ATM</i> L806F   | 63  | F   | Tumor                    | Never          | 0          |                  | Probably damaging/<br>Probably damaging | Neutral     | Affect protein function |
| <i>ATM</i> S877T   | 48  | F   | Tumor                    | Current        | na         |                  | Benign/Benign                           | Neutral     | Tolerated               |
| <i>ATM</i> M1210V  | 42  | M   | Tumor                    | Former         | 10         |                  | Benign/Benign                           | Neutral     | Tolerated               |
| <i>ATM</i> S1383L  | 65  | F   | Tumor                    | Never          | 0          |                  | Possibly damaging/Benign                | Deleterious | Affect protein function |
| <i>ATM</i> C1482Y  | 75  | F   | Tumor                    | Former         | 42         |                  | Benign/Benign                           | Neutral     | Tolerated               |
| <i>ATM</i> R1619K  | na  | na  | Tumor                    | na             | na         | na               | Benign/Benign                           | Neutral     | Tolerated               |
| <i>ATM</i> D1641H  | 60  | F   | Tumor, blood and tissue  | Former         | 45         | Lymphoma         | Probably damaging/<br>Possibly damaging | Deleterious | Affect protein function |
| <i>ATM</i> T1697A  | 60  | F   | Tumor                    | Current        | 10         | Endometrial      | Benign/Benign                           | Neutral     | Tolerated               |
| <i>ATM</i> T2333I  | 41  | M   | Tumor                    | Current        | 11         |                  | Benign/Benign                           | Neutral     | Tolerated               |
| <i>ATM</i> N2370D  | 70  | M   | Tumor                    | Never          | 0          |                  | Benign/Benign                           | Neutral     | Tolerated               |

|                        |    |    |                     |         |    |                 |                                         |             |                            |
|------------------------|----|----|---------------------|---------|----|-----------------|-----------------------------------------|-------------|----------------------------|
| <i>ATM</i><br>R2459G   | na | na | Tumor               | na      | na | na              | Probably damaging/<br>Probably damaging | Deleterious | Affect protein<br>function |
| <i>ATM</i><br>L2490F   | 66 | M  | Tumor,<br>duplicate | Former  | 12 |                 | Probably damaging/<br>Probably damaging | Deleterious | Affect protein<br>function |
| <i>ATM</i><br>G2508R   | 51 | M  | Tumor               | Former  | 70 |                 | Probably damaging/<br>Possibly damaging | Neutral     | Tolerated                  |
| <b><u>BRCA2</u></b>    |    |    |                     |         |    |                 |                                         |             |                            |
| <i>BRCA2</i><br>N235D  | 74 | F  | Tumor               | Former  | 25 |                 | Benign/Benign                           | Neutral     | Tolerated                  |
| <i>BRCA2</i><br>D281N  | 79 | F  | Tumor               | Former  | NA |                 | Probably damaging/<br>Probably damaging | Neutral     | Affect protein<br>function |
| <i>BRCA2</i><br>Y296C  | 58 | M  | Tumor               | Current | 60 |                 | Benign/Benign                           | Neutral     | Tolerated                  |
| <i>BRCA2</i><br>D427H  | na | na | Tumor               | na      | na | na              | Probably damaging/<br>Probably damaging | Neutral     | Affect protein<br>function |
| <i>BRCA2</i><br>C554W  | 73 | M  | Tumor               | Former  | NA | Colon           | Probably damaging/<br>Possibly damaging | Neutral     | Affect protein<br>function |
| <i>BRCA2</i><br>N900D  | 63 | F  | Tumor               | Former  | 36 | Breast          | Possibly damaging/<br>Benign            | Neutral     | Tolerated                  |
| <i>BRCA2</i><br>I1151F | 76 | F  | Tumor               | Former  | 40 |                 | Possibly damaging/<br>Benign            | Deleterious | Tolerated                  |
| <i>BRCA2</i><br>K1153R | 72 | F  | Tumor               | Former  | 40 |                 | Benign/Benign                           | Neutral     | Tolerated                  |
| <i>BRCA2</i><br>I1275T | 70 | F  | Tumor               | Former  | 20 |                 | Benign/Benign                           | Neutral     | Tolerated                  |
| <i>BRCA2</i><br>K1474R | 55 | F  | Tumor               | Current | na |                 | Probably damaging/<br>Possibly damaging | Deleterious | Tolerated                  |
| <i>BRCA2</i><br>S1494R | 67 | F  | Tumor               | Current | 15 | Yes,<br>unknown | Benign/Benign                           | Deleterious | Tolerated                  |
| <i>BRCA2</i><br>V1495I | 66 | F  | Tumor               | Former  | 20 |                 | Benign/Benign                           | Neutral     | Tolerated                  |

|                        |    |    |                     |        |    |                         |                                         |             |                            |
|------------------------|----|----|---------------------|--------|----|-------------------------|-----------------------------------------|-------------|----------------------------|
| <i>BRCA2</i><br>H1640Y | 50 | F  | Tumor               | Former | 30 |                         | Probably damaging/<br>Possibly damaging | Deleterious | Tolerated                  |
| <i>BRCA2</i><br>A1689T | 56 | M  | Tumor               | Former | na |                         | Probably damaging/<br>Probably damaging | Deleterious | Affect protein<br>function |
| <i>BRCA2</i><br>N1805S | 73 | F  | Tumor               | Former | 40 |                         | Possibly damaging/Benign                | Deleterious | Tolerated                  |
| <i>BRCA2</i><br>I1851S | 70 | F  | Tumor               | Former | 28 |                         | Benign/Benign                           | Deleterious | Tolerated                  |
| <i>BRCA2</i><br>I1957T | 75 | M  | Duplicate<br>Normal | na     | NA | Prostate                | Benign/Benign                           | Neutral     | Tolerated                  |
| <i>BRCA2</i><br>H2365Q | NA | F  | Tumor               | Former | 5  |                         | Possibly damaging/Benign                | Neutral     | Affect protein<br>function |
| <i>BRCA2</i><br>P2409L | 62 | M  | Normal<br>Tissue    | Never  | 0  |                         | Probably damaging/<br>Probably damaging | Deleterious | Affect protein<br>function |
| <i>BRCA2</i><br>A2911G | 80 | F  | Tumor               | Former | 25 | Another<br>Lung primary | Possibly damaging/<br>Possibly damaging | Neutral     | Affect protein<br>function |
| <i>BRCA2</i><br>R3052Q | 72 | M  | Tumor               | Former | 35 |                         | Probably damaging/<br>Probably Damaging | Neutral     | Affect protein<br>function |
| <i>BRCA2</i><br>K3083E | na | na | Tumor               | na     | na | BCC                     | Probably damaging/<br>Possibly Damaging | Neutral     | Affect protein<br>function |
| <i>BRCA2</i><br>C3198R | 62 | F  | Tumor               | Former | 75 |                         | Possibly damaging/Benign                | Neutral     | Tolerated                  |
| <i>BRCA2</i><br>R3302K | na | na | Tumor               | na     | na | na                      | Probably damaging/<br>Probably damaging | Neutral     | Affect protein<br>function |
| <i>BRCA2</i><br>E3309K | na | na | Tumor               | na     | na | na                      | Probably damaging/<br>Possibly damaging | Neutral     | Tolerated                  |
| <b><u>CHEK2</u></b>    |    |    |                     |        |    |                         |                                         |             |                            |
| <i>CHEK2</i><br>R188Q  | 86 | F  | Tumor               | na     | na | Cervical                | Probably damaging/<br>Probably damaging | Deleterious | Affect protein<br>function |
| <i>CHEK2</i><br>I294F  | na | na | Tumor               | na     | na | na                      | Probably damaging/<br>Probably damaging | Deleterious | Affect protein<br>function |

|                       |    |    |                     |         |    |       |                                         |             |                            |
|-----------------------|----|----|---------------------|---------|----|-------|-----------------------------------------|-------------|----------------------------|
| <i>CHEK2</i><br>N384T | 48 | F  | Tumor               | Former  | 33 |       | Probably damaging/<br>Possibly damaging | Deleterious | Affect protein<br>function |
| <i>CHEK2</i><br>R562Q | 61 | F  | Tumor               | Former  | 7  |       | Possibly damaging/Benign                | Neutral     | Tolerated                  |
| <b><u>EGFR</u></b>    |    |    |                     |         |    |       |                                         |             |                            |
| <i>EGFR</i><br>Q71R   | 70 | F  | Tumor               | Former  | 20 |       | Possibly damaging/Benign                | Neutral     | Tolerated                  |
| <i>EGFR</i><br>H145R  | na | na | Tumor               | na      | na | CLL   | Benign/Benign                           | Neutral     | Tolerated                  |
| <i>EGFR</i><br>C231S  | na | na | Tumor               | na      | na | na    | Probably damaging/<br>probably damaging | Deleterious | Affect protein<br>function |
| <i>EGFR</i><br>T638A  | 78 | F  | Tumor               | Former  | -- |       | Benign/Benign                           | Neutral     | Tolerated                  |
| <i>EGFR</i><br>G665S  | 68 | M  | Tumor               | Former  | 62 | Penis | Possibly damaging/Benign                | Neutral     | Tolerated                  |
| <i>EGFR</i><br>A743T  | 63 | M  | Tumor,<br>Duplicate | Former  | 50 |       | Probably damaging/<br>Probably damaging | Deleterious | Affect protein<br>function |
| <b><u>PARK2</u></b>   |    |    |                     |         |    |       |                                         |             |                            |
| <i>PARK2</i><br>R455H | 70 | F  | Tumor               | Former  | 20 |       | Probably damaging/<br>probably damaging | Deleterious | Affect protein<br>function |
| <b><u>TP53</u></b>    |    |    |                     |         |    |       |                                         |             |                            |
| <i>TP53</i><br>R363G  | 59 | M  | Tumor               | Current | 80 |       | Benign/Benign                           | Deleterious | Affect protein<br>function |

na, not available
